# Supplementary material for: Evaluating the impact of movement tracking feedback on engagement with home exercise programmes of children with cerebral palsy using a new therapy app: a protocol for a mixed-methods single-case experimental design with alternating treatments
Source: HighWire-hosted journal article supplement (doi:10.1136/bmjopen-2023-082761), 2024-03-01
Supplement: bmjopen-2023-082761supp001_data_supplement.pdf [file bmjopen-2023-082761supp001_data_supplement.pdf]

**Supplementary Material 1 (Table 1).** Study design, treatment, and measurement schedule where B = Bootle Boot Camp (BBCamp) with movement tracking feedback and C = the app without movement tracking feedback, as exemplified for a single participant.

| Pre-Comparison                                                           |   | Comparison   |     |     |     |    |   |   |   |   |    |    |    |    |    |    |    | Best Alone |    |     |     |    |     |     |    | Follow Up |   |
|--------------------------------------------------------------------------|---|--------------|-----|-----|-----|----|---|---|---|---|----|----|----|----|----|----|----|------------|----|-----|-----|----|-----|-----|----|-----------|---|
| Week                                                                     | 0 | 1            |     |     |     | 2  |   |   |   | 3 |    |    |    | 4  |    |    |    | 5          |    |     |     | 6  |     |     |    | 7         | 8 |
| Session                                                                  | - | 1            | 2   | 3   | 4   | 5  | 6 | 7 | 8 | 9 | 10 | 11 | 12 | 13 | 14 | 15 | 16 | 17         | 18 | 19  | 20  | 21 | 22  | 23  | 24 | -         | - |
| Condition                                                                | - | B            | B   | C   | B   | C  | C | B | C | C | B  | C  | B  | C  | B  | C  | B  | B          | B  | B   | B   | B  | B   | B   | B  | -         | - |
| Phase                                                                    |   | QUANTITATIVE |     |     |     |    |   |   |   |   |    |    |    |    |    |    |    |            |    |     |     |    |     |     |    | QUAL      |   |
| Demographics                                                             | x |              |     |     |     |    |   |   |   |   |    |    |    |    |    |    |    |            |    |     |     |    |     |     |    |           |   |
| PEDI-CAT                                                                 | x |              |     |     |     |    |   |   |   |   |    |    |    |    |    |    |    |            |    |     |     |    |     |     |    |           |   |
| Revised PACES                                                            | x |              |     |     |     |    |   |   |   |   |    |    |    |    |    |    |    |            |    |     |     |    |     |     |    |           |   |
| CSAPPA                                                                   | x |              |     |     |     |    |   |   |   |   |    |    |    |    |    |    |    |            |    |     |     |    |     |     |    |           |   |
| Objective 1: Behavioural, Affective, Cognitive Engagement                |   |              |     |     |     |    |   |   |   |   |    |    |    |    |    |    |    |            |    |     |     |    |     |     |    |           |   |
| Adherence*                                                               |   | x            | x   | x   | x   | x  | x | x | x | x | x  | x  | x  | x  | x  | x  | x  | x          | x  | x   | x   | x  | x   | x   | x  |           |   |
| Smileyometer *                                                           |   | x            | x   | x   | x   | x  | x | x | x | x | x  | x  | x  | x  | x  | x  | x  | x          | x  | x   | x   | x  | x   | x   | x  |           |   |
| BBCamp Acceptability Survey                                              |   |              |     |     |     |    |   |   |   |   |    |    |    |    |    | x  |    |            |    |     |     |    |     |     |    |           |   |
| Objective 2: Fidelity of Movement Practice                               |   |              |     |     |     |    |   |   |   |   |    |    |    |    |    |    |    |            |    |     |     |    |     |     |    |           |   |
| Exercise fidelity*                                                       |   | x            | x   | x   | x   | x  | x | x | x | x | x  | x  | x  | x  | x  | x  | x  | x          | x  | x   | x   | x  | x   | x   | x  |           |   |
| Objective 3: Estimate Treatment Response                                 |   |              |     |     |     |    |   |   |   |   |    |    |    |    |    |    |    |            |    |     |     |    |     |     |    |           |   |
| COPM                                                                     | x |              |     |     |     |    |   |   |   |   |    |    |    |    |    |    |    |            |    |     |     |    |     |     |    | x         |   |
| FTSST*                                                                   |   | xxx          |     |     |     | x^ |   |   |   |   |    |    |    |    |    |    |    |            |    | xxx |     |    |     |     |    | x^        |   |
| mTUG*                                                                    |   |              | xxx |     |     | x^ |   |   |   |   |    |    |    |    |    |    |    |            |    |     | xxx |    |     |     |    | x^        |   |
| OLST*                                                                    |   |              |     | xxx |     | x^ |   |   |   |   |    |    |    |    |    |    |    |            |    |     |     |    | xxx |     |    | x^        |   |
| PRT*                                                                     |   |              |     | x   |     | x^ |   |   |   |   |    |    |    |    |    |    |    |            |    |     |     |    | x   |     |    | x^        |   |
| 30STS*                                                                   |   |              |     |     | xxx | x^ |   |   |   |   |    |    |    |    |    |    |    |            |    |     |     |    |     | xxx |    | x^        |   |
| Objective 4: Child, Caregiver and Therapist Experiences and Perspectives |   |              |     |     |     |    |   |   |   |   |    |    |    |    |    |    |    |            |    |     |     |    |     |     |    |           |   |
| Interview                                                                |   |              |     |     |     |    |   |   |   |   |    |    |    |    |    |    |    |            |    |     |     |    |     |     |    | x         | x |
| SUS and BBCamp Usability Survey                                          | x |              |     |     |     |    |   |   |   |   |    |    |    |    |    |    |    |            |    |     |     |    |     |     |    |           |   |
| MARS (1 per app version)                                                 |   |              |     |     |     |    |   |   |   |   |    |    |    |    |    | xx |    |            |    |     |     |    |     |     |    |           |   |
| BBCamp Questions*                                                        |   | x            | x   | x   | x   | x  | x | x | x | x | x  | x  | x  | x  | x  | x  | x  | x          | x  | x   | x   | x  | x   | x   | x  |           |   |

\* denotes measures that will take place as part of BBCamp exercise sessions.

^ denotes measures that will be tested in the following week if exercise session(s) are missed or re-tested if technical or procedural issues are identified on video recordings (as needed).

QUAL: qualitative. PEDI-CAT: Pediatric Evaluation of Disability Inventory Computer Adaptive Test (speedy version). PACES: Physical Activity Enjoyment Scale. CSAPPA: Children's Self Perceptions of Adequacy in and Predilection for Physical Activity Scale. COPM: Canadian Occupational Performance Measure. FTSST: Five Time Sit to Stand Test. mTUG: modified Timed Up and Go Test. OLST: One Leg Stance Test. PRT: Pediatric Reach Test. 30STS: 30 Second Sit to Stand Test. SUS: System Usability Scale. MARS: Mobile App Rating Scale.
