# Supplementary material for: Evaluating the impact of movement tracking feedback on engagement with home exercise programmes of children with cerebral palsy using a new therapy app: a protocol for a mixed-methods single-case experimental design with alternating treatments
Source: HighWire-hosted journal article supplement (doi:10.1136/bmjopen-2023-082761), 2024-03-01
Supplement: bmjopen-2023-082761supp002_data_supplement.pdf [file bmjopen-2023-082761supp002_data_supplement.pdf]

Supplementary Material 2. Adherence, exercise fidelity and star ratings as exemplified across four exercise sessions for a sample participant.

| Prescribed Home Exercise Program |             |      |                |
|----------------------------------|-------------|------|----------------|
| Exercises                        | Repetitions | Sets | Time (seconds) |
| 1. Sit to stand                  | 10          | 2    | N/A            |
| 2. Marching                      | N/A         | 1    | 30             |
| 3. Calf stretch                  | N/A         | 2    | 30             |

Day 1 Exercise Session

| Exercises                              | Repetitions or Timed Attempts | Repetitions or Time Prescribed (Per Set) | Proportion Attempted (Adherence) | Acceptable Repetitions or Best Time    | Repetitions or Time Prescribed (Per Set) | Acceptable Proportion (Exercise Fidelity) | Star Rating* (Per Set) | Average Star Rating (Across Sets) |
|----------------------------------------|-------------------------------|------------------------------------------|----------------------------------|----------------------------------------|------------------------------------------|-------------------------------------------|------------------------|-----------------------------------|
| 1.Sit to stand (set 1)                 | 10                            | 10                                       | 10/10 = 1.0                      | 8                                      | 10                                       | 8/10 = 0.8                                | 3                      | 3<br>(8+9=17/20 =0.85)            |
| 2. Sit to stand (set 2)                | 10                            | 10                                       | 10/10 = 1.0                      | 9                                      | 10                                       | 9/10 = 0.9                                | 3                      |                                   |
| 3.Marching                             | 25s + 5s                      | 30s                                      | 30/30s = 1.0                     | 25                                     | 30                                       | 25/30 = 0.83                              | 3                      | 3                                 |
| 4.Calf stretch (set 1)                 | 10s + 10s + 10s               | 30s                                      | 30/30 = 1.0                      | 10                                     | 30                                       | 10/30 = 0.33                              | 1                      | 1<br>(10+10=20/60 =0.33)          |
| 5.Calf stretch (set 2)                 | 10s + 10s + 10s               | 30s                                      | 30/30 = 1.0                      | 10                                     | 30                                       | 10/30 = 0.33                              | 1                      |                                   |
| Mean Proportion of Prescribed Attempts |                               |                                          | 1.0                              | Mean Proportion of Acceptable Attempts |                                          | 0.64                                      |                        |                                   |

\*Star ratings are awarded based on exercise fidelity with 1 star awarded with <50% of repetitions are completed with appropriate fidelity, 2 stars when 50-75% of repetitions are completed with appropriate fidelity and 3 stars when >75% of repetitions are completed with appropriate fidelity.

Day 2 Exercise Session

| Exercises                              | Repetition or Timed Attempts | Repetitions or Time Prescribed (Per Set) | Proportion Attempted (Adherence) | Acceptable Repetitions or Best Time    | Repetitions or Time Prescribed (Per Set) | Acceptable Proportion (Exercise Fidelity) | Star Rating (Per Set) | Average Star Rating (Across All Sets) |
|----------------------------------------|------------------------------|------------------------------------------|----------------------------------|----------------------------------------|------------------------------------------|-------------------------------------------|-----------------------|---------------------------------------|
| 1.Sit to stand (set 1)                 | 12                           | 10                                       | 12/10 = 1.2                      | 8                                      | 10                                       | 8/10 = 0.8                                | 3                     | 3<br>(8+9=17/20 =0.85)                |
| 2. Sit to stand (set 2)                | 13                           | 10                                       | 13/10 = 1.3                      | 9                                      | 10                                       | 9/10 = 0.9                                | 3                     |                                       |
| 3.Marching                             | 15s + 10s + 5s               | 30s                                      | 30/30 = 1.0                      | 15                                     | 30                                       | 15/30 = 0.5                               | 1                     | 1                                     |
| 4.Calf stretch (set 1)                 | 10s + 7s + 10s               | 27                                       | 27/30 = 0.9                      | 10                                     | 30                                       | 10/30 =0.33                               | 1                     | 1<br>(10+18=28/60 =0.47)              |
| 5.Calf stretch (set 2)                 | 18s + 12s                    | 30s                                      | 30/30 = 1.0                      | 18                                     | 30                                       | 18/30 = 0.60                              | 2                     |                                       |
| Mean Proportion of Prescribed Attempts |                              |                                          | 1.08                             | Mean Proportion of Acceptable Attempts |                                          | 0.63                                      |                       |                                       |

Day 3 Exercise Session

| Exercises               | Repetition or Timed Attempts | Repetitions or Time Prescribed (Per Set) | Proportion Attempted (Adherence) | Acceptable Repetitions or Best Time | Repetitions or Time Prescribed (Per Set) | Acceptable Proportion (Exercise Fidelity) | Star Rating (Per Set) | Average Star Rating (Across All Sets) |
|-------------------------|------------------------------|------------------------------------------|----------------------------------|-------------------------------------|------------------------------------------|-------------------------------------------|-----------------------|---------------------------------------|
| 1.Sit to stand (set 1)  | 7                            | 10                                       | 7/10 = 0.7                       | 5                                   | 10                                       | 5/10 = 0.5                                | 1                     | 1<br>(5+1=5/20 =0.25)                 |
| 2. Sit to stand (set 2) | 1                            | 10                                       | 1/10 = 0.1                       | 1                                   | 10                                       | 1/10 = 0.1                                | 1                     |                                       |
| 2.Marching              | 5s + 5s                      | 30s                                      | 10/30 = 0.33                     | 5                                   | 30                                       | 5/30 = 0.17                               | 1                     | 1                                     |

|                                        |              |     |              |                                           |    |             |   |                            |
|----------------------------------------|--------------|-----|--------------|-------------------------------------------|----|-------------|---|----------------------------|
| 3.Calf stretch<br>(set 1)              | 29s + 1s     | 30s | 30/30 = 1.0  | 29                                        | 30 | 29/30 =0.97 | 3 | 2<br>(29+6=35/60<br>=0.58) |
| 4.Calf stretch<br>(set 2)              | 3s + 2s + 6s | 30s | 11/30 = 0.37 | 6                                         | 30 | 6/30 = 0.20 | 1 |                            |
| Mean Proportion of Prescribed Attempts |              |     | 0.68         | Mean Proportion of<br>Acceptable Attempts |    | 0.42        |   |                            |

Day 4 Exercise Session

| Exercises                              | Repetition or Timed Attempts | Repetitions or Time Prescribed (Per Set) | Proportion Attempted (Adherence) | Acceptable Repetitions or Best Time    | Repetitions or Time Prescribed (Per Set) | Acceptable Proportion (Exercise Fidelity) | Star Rating (Per Set) | Average Star Rating (Across All Sets) |
|----------------------------------------|------------------------------|------------------------------------------|----------------------------------|----------------------------------------|------------------------------------------|-------------------------------------------|-----------------------|---------------------------------------|
| 1.Sit to stand (set 1)                 | 13                           | 10                                       | 13/10 = 1.3                      | 9                                      | 10                                       | 9/10 = 0.9                                | 3                     | 2<br><br>(9+4=13/20 =0.65)            |
| 2. Sit to stand (set 2)                | 5                            | 10                                       | 5/10 = 0.5                       | 4                                      | 10                                       | 4/10 = 0.4                                | 1                     |                                       |
| 2.Marching                             | 24s + 4s + 2s                | 30s                                      | 30/30 = 1.0                      | 24                                     | 30                                       | 24/30 =0.80                               | 3                     | 3                                     |
| 3.Calf stretch (set 1)                 | 10s + 10s + 10s              | 30s                                      | 30/30 = 1.0                      | 10                                     | 30                                       | 10/30 =0.33                               | 1                     | 2<br><br>(10+28=38/60 =0.63)          |
| 4.Calf stretch (set 2)                 | 28s                          | 30s                                      | 28/30 = 0.93                     | 28                                     | 30                                       | 28/30 =0.93                               | 3                     |                                       |
| Mean Proportion of Prescribed Attempts |                              |                                          | 0.95                             | Mean Proportion of Acceptable Attempts |                                          | 0.67                                      |                       |                                       |
